# Supplementary material
Source: ML conference proceedings conference paper supplement (https://openreview.net/forum?id=WPU17d1l7R)
Supplement: supplementary_material [file appendix.pdf › appendix.pdf]

## 426 A Visualization of the generated videos

427 We provide visualization comparison between SAPAttn and Dense Attention on HunyuanVideo and  
 428 Wan 2.1. Results in Figure 9 and Figure 10 demonstrate that SAPAttn can preserve high pixel-level  
 429 fidelity, achieving similar generation quality compared with the dense attention. Real video samples  
 430 are provided in the supplementary materials.

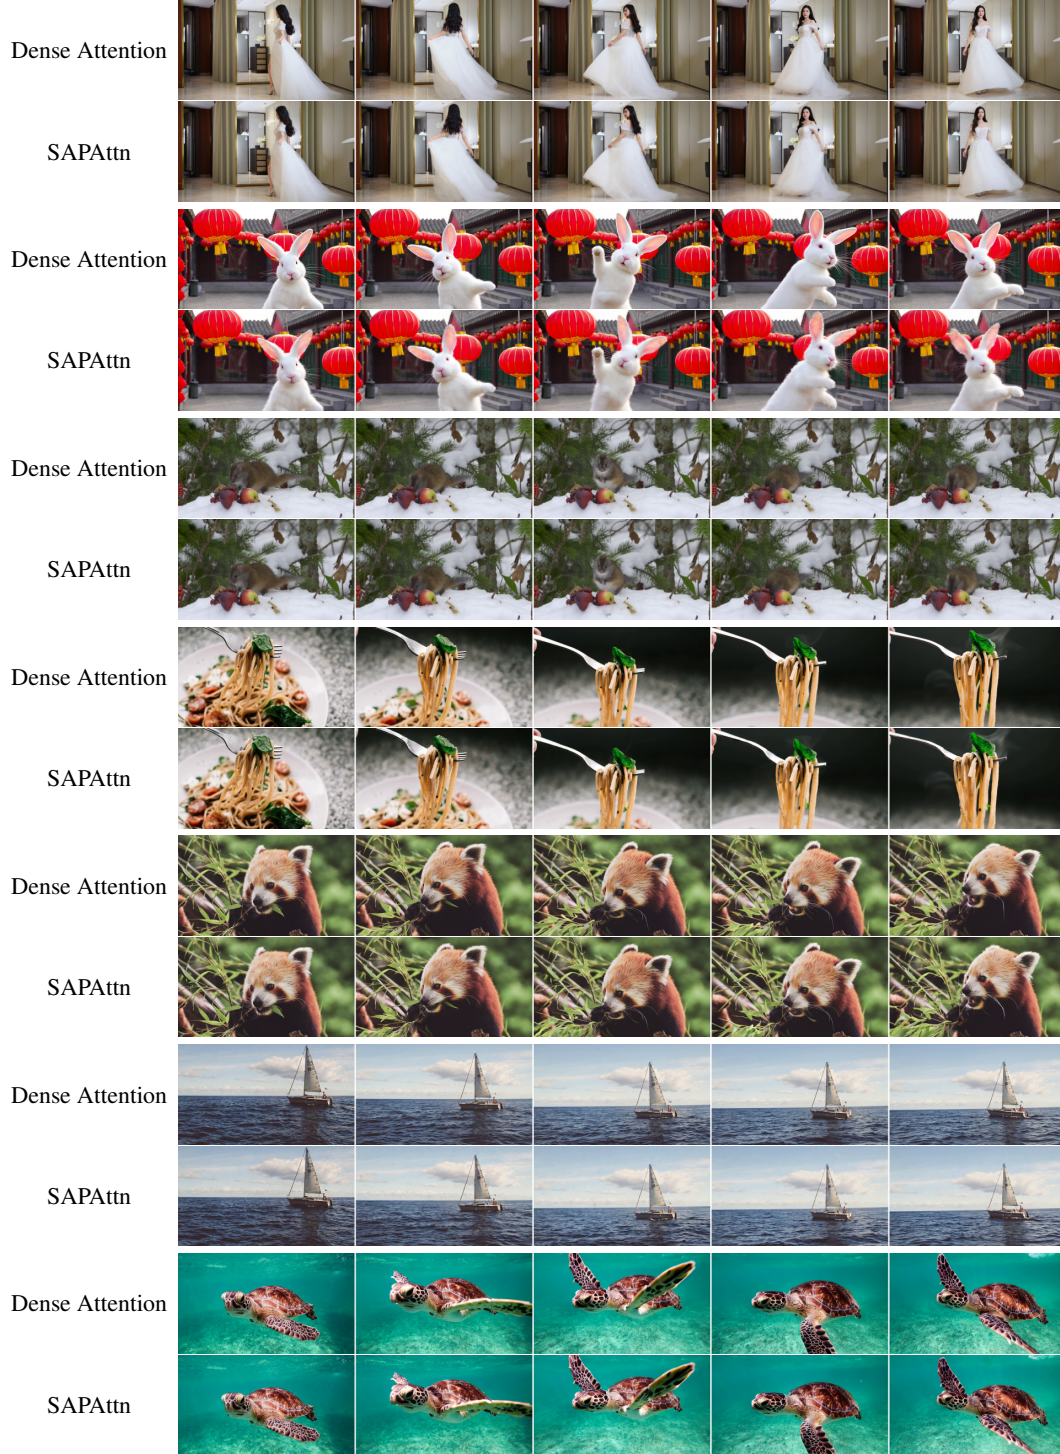

Figure 9: Comparison of Dense Attention and SAPAttn on HunyuanVideo and Wan 2.1 Text-to-Video generation.



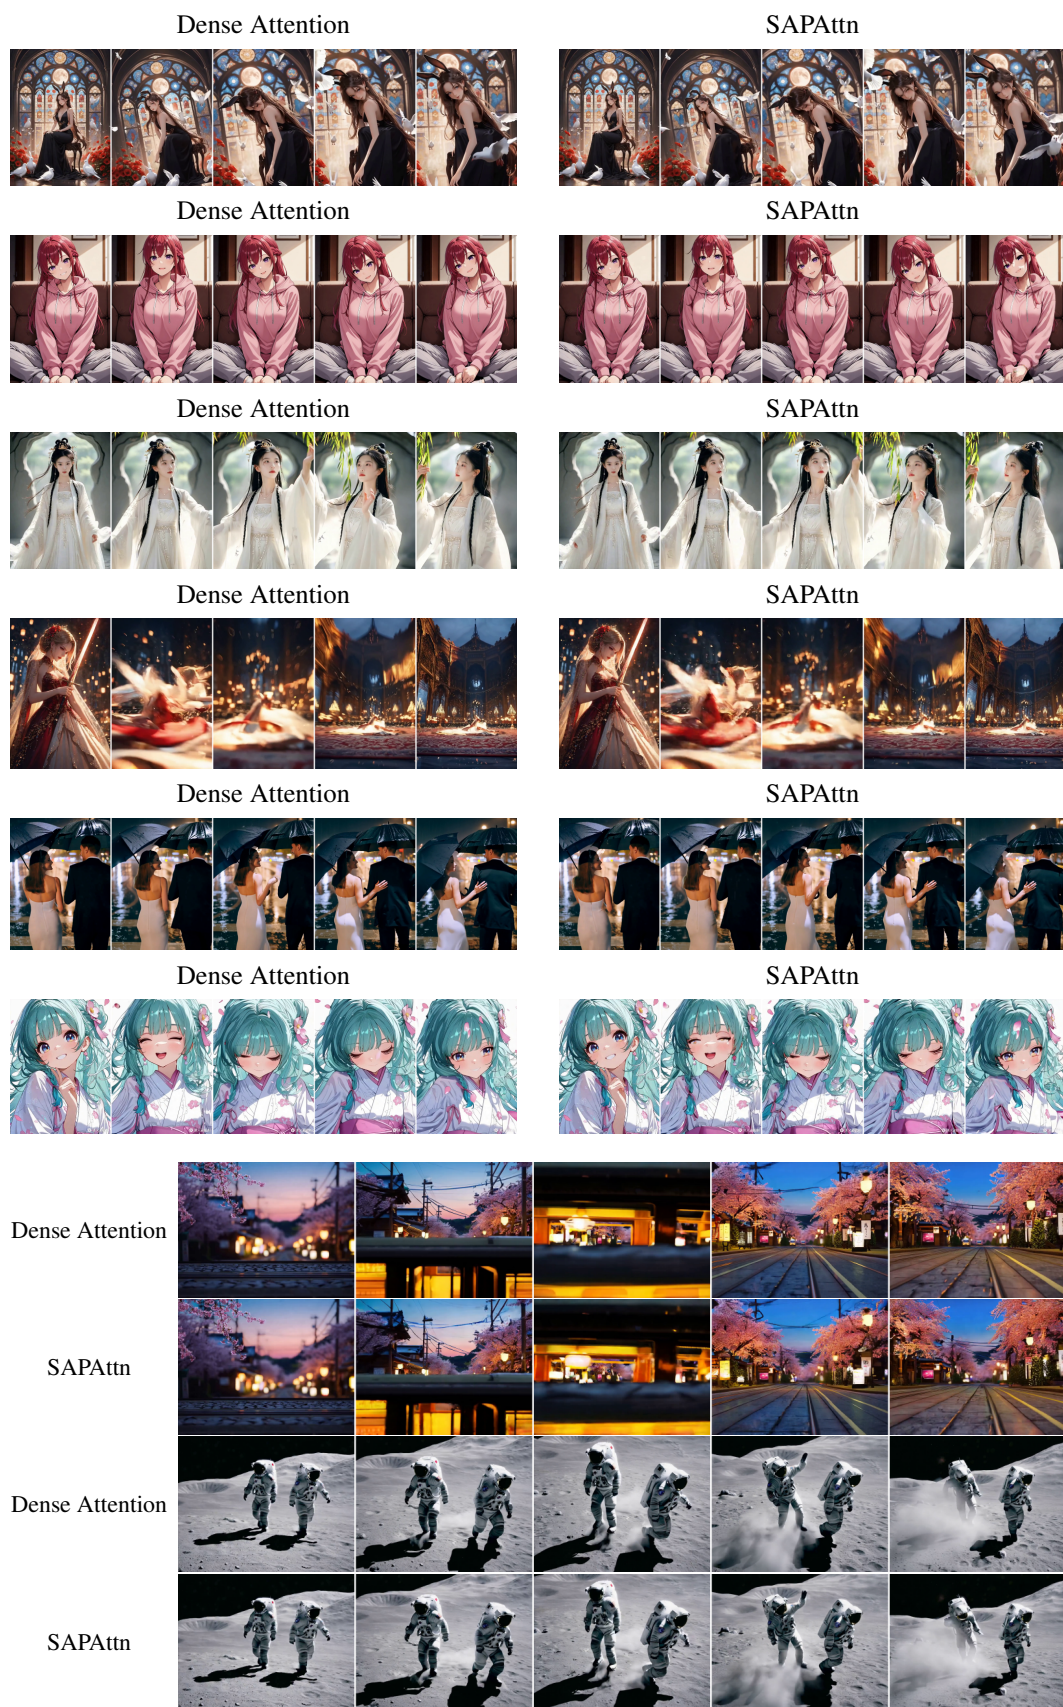

Figure 10: Comparison of Dense Attention and SAPAttn on Wan 2.1 Image-to-Video generation.
